# Supplementary material for: Long-read sequencing unveils high-resolution HPV integration and its oncogenic progression in cervical cancer
Source: PubMed Central journal article supplement (PMC9091225; doi:10.1038/s41467-022-30190-1), 2022-05-10

Long-read sequencing unveils high-resolution HPV integration and its oncogenic  
progression in cervical cancer

Liyuan Zhou, Qiongzi Qiu, Qing Zhou, Jianwei Li, Mengqian Yu, Kezhen Li, Lingling Xu, Xiaohui Ke,  
Haiming Xu, Bingjian Lu, Hui Wang, Weiguo Lu, Pengyuan Liu, Yan Lu

**Supplementary Data**

**Table S1.** Quality metrics of ONT long read sequencing libraries.

**Table S2.** Genes potentially disrupted by HPV integration breakpoints.

**Table S3.** Integration breakpoints and their involved events.

**Table S4.** Details of PCR validation of breakpoints in clonal integration events.

**Table S5.** Quality metrics of RNA sequencing libraries.

**Table S6.** Statistical test and its associated significance of comparison between intSample and intRegion for each feature.

**Table S7.** List of PCR primers and siRNAs used in this study.

**Figure S1.** PCR validation of breakpoints in clonal integration events.

**Figure S2.** The base coverage of regions around several integration events in the human genome.

**Figure S3.** PCR validation of the ECC DNA structure

**Figure S4.** GO and KEGG enrichment analysis of genes potentially disrupted by HPV integration.

**Figure S5.** Expression level of genes around integration breakpoints and on affected genomic regions resulting from clonal integration events.

**Figure S6.** Knockdown assays of LENG9 in cervical cancer cell line CaSki.

**Figure S7.** Comparative expression level of LINC00290 and HPV E6/E7 genes in 103 cervical tumors.

**Figure S8.** Structural variation landscape in cervical cancer.

**Figure S9.** Genomic properties of structural variations in different regions.

**Figure S10.** Seven additional clonal integration events with one supporting chimeric read in ZLR-11.

**Table S1** Quality metrics of ONT long read sequencing data

| <b>Patient-ID</b> | <b>Reads</b> | <b>Sequences (Gb)</b> | <b>N50Len</b> | <b>N90Len</b> | <b>MeanLen</b> | <b>MaxLen</b> | <b>MeanQual</b> | <b>Mapping Rate</b> |
|-------------------|--------------|-----------------------|---------------|---------------|----------------|---------------|-----------------|---------------------|
| ZLR-01            | 14,147,490   | 103.6                 | 8575          | 4846          | 7322           | 184336        | 8.6             | 0.968               |
| ZLR-02            | 9,549,474    | 87.7                  | 13840         | 4994          | 9187           | 301188        | 9.6             | 0.958               |
| ZLR-03            | 15,726,406   | 85.0                  | 9892          | 2350          | 5403           | 145349        | 9.3             | 0.948               |
| ZLR-04            | 16,886,600   | 96.8                  | 9936          | 2589          | 5731           | 137249        | 9.2             | 0.945               |
| ZLR-05            | 11,072,865   | 92.7                  | 11976         | 4821          | 8367           | 122305        | 9.0             | 0.959               |
| ZLR-06            | 18,183,696   | 120.9                 | 10830         | 3090          | 6646           | 144644        | 9.1             | 0.959               |
| ZLR-07            | 10,072,705   | 90.3                  | 12096         | 5188          | 8962           | 152051        | 8.8             | 0.964               |
| ZLR-08            | 19,284,204   | 119.6                 | 8891          | 3229          | 6201           | 696229        | 11.2            | 0.956               |
| ZLR-09            | 25,981,598   | 105.5                 | 7803          | 1656          | 4059           | 129929        | 9.1             | 0.950               |
| ZLR-10            | 11,695,389   | 89.2                  | 10720         | 4042          | 7631           | 127396        | 9.5             | 0.967               |
| ZLR-11            | 13,144,570   | 95.8                  | 11282         | 3690          | 7290           | 136647        | 8.9             | 0.960               |
| ZLR-12            | 10,564,581   | 87.3                  | 13115         | 4072          | 8265           | 140681        | 9.0             | 0.961               |
| ZLR-13            | 13,690,031   | 111.1                 | 11528         | 4403          | 8111           | 121077        | 9.3             | 0.963               |
| ZLR-14            | 10,926,167   | 102.7                 | 13122         | 5202          | 9398           | 135722        | 9.2             | 0.964               |
| ZLR-15            | 15,439,607   | 116.2                 | 10665         | 4426          | 7523           | 154834        | 9.6             | 0.962               |
| ZLR-16            | 16,596,177   | 129.7                 | 10726         | 4607          | 7812           | 136714        | 9.4             | 0.963               |

**Table S2** Genes potentially disrupted by integration breakpoints

| Patient-ID | Human |           |                       |                | HPV      |      |       |
|------------|-------|-----------|-----------------------|----------------|----------|------|-------|
|            | Chr   | Pos       | Gene                  | Region         | HPV Type | Pos  | Gene  |
| ZLR-01     | chr4  | 182138890 | LINC00290;TEMN3-AS1   | intergenic     | 16       | 3368 | E2,E4 |
| ZLR-01     | chr4  | 182273142 | LINC00290;TEMN3-AS1   | intergenic     | 16       | 5305 | L2    |
| ZLR-02     | chr11 | 64975398  | CAPN1                 | intronic       | 16       | 2138 | E1    |
| ZLR-02     | chr11 | 64974748  | CAPN1                 | intronic       | 16       | 3570 | E2,E4 |
| ZLR-03     | chr10 | 104080707 | GBF1                  | intronic       | 16       | 2191 | E1    |
| ZLR-03     | chr10 | 104084259 | GBF1                  | intronic       | 16       | 6139 | L1    |
| ZLR-03     | chr10 | 104080663 | GBF1                  | intronic       | 16       | 2186 | E1    |
| ZLR-04     | chr20 | 14754684  | MACROD2               | intronic       | 16       | 2991 | E2    |
| ZLR-04     | chr20 | 14842487  | MACROD2               | intronic       | 16       | 2834 | E2    |
| ZLR-04     | chr20 | 14840951  | MACROD2               | intronic       | 16       | 3086 | E2    |
| ZLR-06     | chr3  | 137186017 | IL20RB;SOX14          | intergenic     | 16       | 6291 | L1    |
| ZLR-06     | chr4  | 81210954  | FGF5                  | UTR3           | 16       | 2026 | E1    |
| ZLR-06     | chr4  | 81212477  | FGF5                  | downstream     | 16       | 1825 | E1    |
| ZLR-06     | chr9  | 75392601  | TMC1                  | intronic       | 16       | 1093 | E1    |
| ZLR-06     | chr9  | 75532466  | ALDH1A1               | intronic       | 16       | 1451 | E1    |
| ZLR-06     | chr9  | 75413449  | TMC1                  | intronic       | 16       | 1833 | E1    |
| ZLR-06     | chr3  | 137188183 | IL20RB;SOX14          | intergenic     | 16       | 1775 | E1    |
| ZLR-06     | chr8  | 49845734  | SNAI2;C8orf22         | intergenic     | 16       | 306  | E6    |
| ZLR-06     | chr12 | 103589765 | LOC101929058;C12orf42 | intergenic     | 16       | 7339 | URR   |
| ZLR-06     | chr8  | 49845725  | SNAI2;C8orf22         | intergenic     | 16       | 7050 | L1    |
| ZLR-06     | chr1  | 48168486  | FOXD2;TRABD2B         | intergenic     | 16       | 2339 | E1    |
| ZLR-06     | chr12 | 103589678 | LOC101929058;C12orf42 | intergenic     | 16       | 3478 | E2,E4 |
| ZLR-06     | chr9  | 75433908  | TMC1                  | intronic       | 16       | 4628 | L2    |
| ZLR-07     | chr2  | 146386905 | TEX41;PABPC1P2        | intergenic     | 16       | 1955 | E1    |
| ZLR-07     | chr2  | 146498465 | TEX41;PABPC1P2        | intergenic     | 16       | 909  | E1    |
| ZLR-08     | chr19 | 54983022  | CDC42EP5              | intronic       | 16       | 2274 | E1    |
| ZLR-08     | chr19 | 54974840  | LENG9                 | UTR5           | 16       | 2636 | E1    |
| ZLR-08     | chr19 | 54970568  | LENG8                 | intronic       | 16       | 7029 | L1    |
| ZLR-08     | chr19 | 54974755  | LENG9                 | exonic         | 16       | 7906 | URR   |
| ZLR-08     | chr19 | 54984924  | CDC42EP5              | upstream       | 16       | 2024 | E1    |
| ZLR-08     | chr19 | 54978308  | CDC42EP5              | intronic       | 16       | 3050 | E2    |
| ZLR-08     | chr19 | 54970599  | LENG8                 | intronic       | 16       | 1686 | E1    |
| ZLR-08     | chr19 | 54983028  | CDC42EP5              | intronic       | 16       | 2276 | E1    |
| ZLR-08     | chr19 | 54974755  | LENG9                 | exonic         | 16       | 131  | E6    |
| ZLR-08     | chr19 | 54974756  | LENG9                 | exonic         | 16       | 6486 | L1    |
| ZLR-08     | chr19 | 54979846  | CDC42EP5              | intronic       | 16       | 4968 | L2    |
| ZLR-08     | chr19 | 54978038  | CDC42EP5              | intronic       | 16       | 1642 | E1    |
| ZLR-09     | chr4  | 142864411 | IL15;INPP4B           | intergenic     | 16       | 4003 | E5    |
| ZLR-09     | chr4  | 142649381 | IL15                  | intronic       | 16       | 3226 | E2    |
| ZLR-10     | chr10 | 79694897  | DLG5-AS1;POLR3A       | intergenic     | 16       | 3411 | E2,E4 |
| ZLR-11     | chr15 | 86031825  | AKAP13                | intronic       | 16       | 2797 | E2,E1 |
| ZLR-11     | chr8  | 128323818 | CASC21;CASC8          | ncRNA_intronic | 16       | 2799 | E2,E1 |
| ZLR-11     | chr8  | 128323153 | CASC21;CASC8          | ncRNA_intronic | 16       | 4464 | L2    |
| ZLR-11     | chr8  | 128323315 | CASC21;CASC8          | ncRNA_intronic | 16       | 478  | E6    |
| ZLR-11     | chr8  | 128419658 | CASC8                 | ncRNA_intronic | 16       | 2636 | E1    |
| ZLR-11     | chr15 | 85988611  | AKAP13                | intronic       | 16       | 4774 | L2    |
| ZLR-11     | chr8  | 128419658 | CASC8                 | ncRNA_intronic | 16       | 7784 | URR   |
| ZLR-11     | chr8  | 128323084 | CASC21;CASC8          | ncRNA_intronic | 16       | 4368 | L2    |
| ZLR-11     | chr8  | 128419610 | CASC8                 | ncRNA_intronic | 16       | 7781 | URR   |
| ZLR-11     | chr15 | 86014813  | AKAP13                | intronic       | 16       | 5226 | L2    |
| ZLR-12     | chr17 | 36095944  | HNF1B                 | intronic       | 16       | 3409 | E2,E4 |
| ZLR-12     | chr17 | 36095602  | HNF1B                 | intronic       | 16       | 37   | URR   |
| ZLR-12     | chr17 | 36095602  | HNF1B                 | intronic       | 16       | 5979 | L1    |
| ZLR-12     | chr17 | 36094082  | HNF1B                 | intronic       | 16       | 4573 | L2    |
| ZLR-13     | chr13 | 73982893  | KLF5;LINC00392        | intergenic     | 16       | 3331 | E2    |
| ZLR-13     | chr13 | 73982772  | KLF5;LINC00392        | intergenic     | 16       | 4686 | L2    |
| ZLR-13     | chr13 | 73982955  | KLF5;LINC00392        | intergenic     | 16       | 3285 | E2    |
| ZLR-14     | chr13 | 73922258  | KLF5;LINC00392        | intergenic     | 16       | 2728 | E1    |
| ZLR-14     | chr13 | 73955322  | KLF5;LINC00392        | intergenic     | 16       | 1478 | E1    |
| ZLR-15     | chr14 | 91451921  | RPS6KA5               | intronic       | 16       | 2972 | E2    |
| ZLR-15     | chr14 | 91451918  | RPS6KA5               | intronic       | 16       | 3049 | E2    |
| ZLR-16     | chr17 | 57757805  | CLTC                  | intronic       | 58       | 3821 | E2    |
| ZLR-16     | chr17 | 57879163  | VMP1                  | intronic       | 58       | 6409 | L1    |

**Table S3** Integration breakpoints and their related events.

| Patient-ID | Breakpoints                | Events involved | GT:DR:DV  |
|------------|----------------------------|-----------------|-----------|
| ZLR-01     | Chr4:182138890_HP16:3368   | e               | 0/0:22:7  |
| ZLR-01     | Chr4:182273142_HP16:5305   | e               | 0/0:15:5  |
| ZLR-02     | Chr11:64974748_HP16:3570   | e               | 0/1:8:14  |
| ZLR-02     | Chr11:64975398_HP16:2138   | e               | 1/1:1:18  |
| ZLR-03     | Chr10:104080707_HP16:2191  | e               | 0/1:20:45 |
| ZLR-03     | Chr10:104084259_HP16:6139  | e               | 1/1:8:54  |
| ZLR-03     | Chr10:104080663_HP16:2186  | @               | 0/0:20:4  |
| ZLR-04     | Chr20:14754684_HP16:2991   | e               | 0/1:13:23 |
| ZLR-04     | Chr20:14840951_HP16:3086   | e               | 0/1:4:16  |
| ZLR-04     | Chr20:14842487_HP16:2834   | @               | 1/1:0:3   |
| ZLR-06     | Chr1:48168486_HP16:2339    | @               | 0/1:12:8  |
| ZLR-06     | Chr3:137186017_HP16:6291   | e1              | 0/0:34:12 |
| ZLR-06     | Chr3:137188183_HP16:1775   | e1              | 1/1:3:19  |
| ZLR-06     | Chr4:81210954_HP16:2026    | @               | 0/0:11:4  |
| ZLR-06     | Chr4:81212477_HP16:1825    | @               | 1/1:0:4   |
| ZLR-06     | Chr8:49845725_HP16:7050    | @               | 0/1:19:31 |
| ZLR-06     | Chr8:49845734_HP16:306     | @               | 1/1:0:25  |
| ZLR-06     | Chr9:75392601_HP16:1093    | @               | 0/1:12:16 |
| ZLR-06     | Chr9:75413449_HP16:1833    | e2              | 0/1:29:39 |
| ZLR-06     | Chr9:75433908_HP16:4628    | @               | 0/0:35:3  |
| ZLR-06     | Chr9:75532466_HP16:1451    | e2              | 0/1:14:33 |
| ZLR-06     | Chr12:103589678_HP16:3478  | @               | 0/1:7:4   |
| ZLR-06     | Chr12:103589765_HP16:7339  | @               | 1/1:0:5   |
| ZLR-07     | Chr2:146386905_HP16:1955   | @               | 0/0:9:3   |
| ZLR-07     | Chr2:146498465_HP16:909    | @               | 0/0:29:3  |
| ZLR-08     | Chr19:54983022_HP16:2274   | @               | 1/1:1:22  |
| ZLR-08     | Chr19:54974840_HP16:2636   | e2              | 1/1:0:45  |
| ZLR-08     | Chr19:54970568_HP16:7029   | e1              | 0/1:18:19 |
| ZLR-08     | Chr19:54974755_HP16:7906   | @               | 0/0:19:3  |
| ZLR-08     | Chr19:54984924_HP16:2024   | @               | 0/1:4:15  |
| ZLR-08     | Chr19:54978308_HP16:3050   | e3              | 1/1:0:5   |
| ZLR-08     | Chr19:54970599_HP16:1686   | e4              | 1/1:0:18  |
| ZLR-08     | Chr19:54983028_HP16:2276   | e1/e2/e3/e4/e5  | 1/1:0:84  |
| ZLR-08     | Chr19:54974755_HP16:131    | @               | 0/0:19:3  |
| ZLR-08     | Chr19:54974756_HP16:6486   | @               | 1/1:0:4   |
| ZLR-08     | Chr19:54979846_HP16:4968   | @               | 1/1:0:4   |
| ZLR-08     | Chr19:54978038_HP16:1642   | e5              | 1/1:0:4   |
| ZLR-09     | Chr4:142649381_HP16:3226   | @               | 0/1:18:19 |
| ZLR-09     | Chr4:142864411_HP16:4003   | @               | 0/1:9:20  |
| ZLR-10     | Chr10:79694897_HP16:3411   | @               | 0/0:16:6  |
| ZLR-11     | Chr8:128323084_HP16:4368   | e1/e3/e4        | 1/1:2:268 |
| ZLR-11     | Chr8:128323818_HP16:2799   | @               | 1/1:0:18  |
| ZLR-11     | Chr8:128323315_HP16:478    | e3              | 0/1:8:13  |
| ZLR-11     | Chr8:128419658_HP16:7784   | e1/e2/e3        | 1/1:0:266 |
| ZLR-11     | Chr8:128419658_HP16:2636   | @               | 1/1:0:8   |
| ZLR-11     | Chr15:85988611_HP16:4774   | e2/e3           | 1/1:1:52  |
| ZLR-11     | Chr15:86014813_HP16:5226   | @               | 0/0:22:5  |
| ZLR-11     | Chr15:86031825_HP16:2797   | e4              | 1/1:17:74 |
| ZLR-11     | Chr8:128323153_HP16:4464   | @               | 1/1:0:12  |
| ZLR-11     | Chr8:128419610_HP16:7781   | @               | 1/1:0:7   |
| ZLR-12     | Chr17:36094082_HP16:4573   | e3              | 1/1:4:18  |
| ZLR-12     | Chr17:36095602_HP16:5979   | e1/e2/e3        | 1/1:1:58  |
| ZLR-12     | Chr17:36095602_HP16:637    | @               | 0/1:1:4   |
| ZLR-12     | Chr17:36095944_HP16:3409   | e1/e2           | 1/1:1:44  |
| ZLR-13     | Chr13:73982772_HP16:4686   | @               | 1/1:0:4   |
| ZLR-13     | Chr13:73982893_HP16:3331   | e               | 1/1:0:154 |
| ZLR-13     | Chr13:73982955_HP16:3285   | e               | 1/1:0:8   |
| ZLR-14     | Chr13:73922258_HP16:2728   | e               | 0/1:18:24 |
| ZLR-14     | Chr13:73955322_HP16:1478   | e               | 1/1:5:23  |
| ZLR-15     | Chr14:91451918_HP16:3049   | e               | 1/1:0:54  |
| ZLR-15     | Chr14:91451921_HP16:2972   | e               | 1/1:0:55  |
| ZLR-16     | Chr17:57757805_HP16:583821 | e               | 0/0:21:4  |
| ZLR-16     | Chr17:57879163_HP16:586409 | e               | 0/1:20:12 |

**Note:** “@” indicates that breakpoints are not involved in any detected clonal integration events; “e” indicates that breakpoints are involved in that clonal integration event; GT: genotype; DR: number of high-quality reference reads; DV: number of high-quality variant reads.

**Table S4.** Details of PCR validation of breakpoints in clonal integration events

| ID | Patient-ID | Breakpoints                   | Forward primer           | Reverse primer           | Expected PCR product size (bp) | Validation |
|----|------------|-------------------------------|--------------------------|--------------------------|--------------------------------|------------|
| 1  | ZLR-01     | Chr4:182273124_HPV16:5305     | GCCCGAATATGATGAGGCAC     | ACCTAATGGCTGACCACGAC     | 959bp                          | YES        |
| 2  | ZLR-01     | HPV16:3374_Chr4:182138890     | TGCCAACACTGGCTGTATCAA    | AGCCACTTACTGAGCATTCCC    | 978bp                          | YES        |
| 3  | ZLR-02     | Chr11:64974748_HPV16:3572     | AGCCACTTACTGAGCATTCCC    | CATGCGGGTGGTCAGGTAAT     | 735bp                          | YES        |
| 4  | ZLR-02     | HPV16:4051_HPV16:6654         | TAGCCGATGCACGTTTTGTG     | GTGGTGGGTGTAGCTTTTCG     | 687bp                          | YES        |
| 5  | ZLR-02     | HPV16:2144_Chr11:64975399     | TGTATGGAGACACGCCAGAA     | CGACTCATGCAGACCAAGGG     | 730bp                          | YES        |
| 6  | ZLR-08     | HPV16:1686_Chr19:54970602     | GGGTGGTTGCAGTCAGTACA     | CAGTCCCTCCCTAGCTCCAA     | 598bp                          | YES        |
| 7  | ZLR-08     | HPV16:1691_Chr19:54978038     | CAACGTGTTGCGATTGGTGT     | AGGTTGTAGTCTCAAGATCAGGT  | 410bp                          | YES        |
| 8  | ZLR-12     | Chr11:100590122_HPV16:2599    | TGTCAGGCACAGCTAAACGA     | AGCACATTCTAGGCGCATGT     | 520bp                          | NO         |
| 9  | ZLR-12     | HPV16:4572_Chr17:36094082     | CGCTGCTTTTGTCTGTGTCT     | AGAGGTGGGGAGTGCTATCT     | 810bp                          | YES        |
| 10 | ZLR-12     | Chr17:36095594_HPV16:5983     | GCTACCACCTCCCTTTGTGA     | ATTTGCAGTAGACCCAGAGCC    | 967bp                          | YES        |
| 11 | ZLR-13     | Chr13:73989111_Chr13:73980114 | AGGCCACTGACTCCAGATTT     | TGCTACTCCTGGCCCTATCT     | 463bp                          | YES        |
| 12 | ZLR-11     | HPV16:473_Chr8: 128323314     | GCGACCCAGAAAGTTACCAC     | AGCAGTGATCCGTTTATCCCC    | 519bp                          | YES        |
| 13 | ZLR-11     | Chr15:86031825_HPV16:2797     | AGGTTTTTGGTTAGGGAACAGTTG | ATGGTGCAGCTAACACAGGT     | 687bp                          | YES        |
| 14 | ZLR-16     | Chr17:57757805_HPV58:5597     | TAGAACTGCAAATGAGATGGGGT  | TCGTA CTGCAGTGGAAAGC     | 577bp                          | YES        |
| 15 | ZLR-16     | HPV58:4600_HPV58:7602         | CAGGAGCAGGCGATATGTCA     | CACCATCCACCAAACGCAA      | 974bp                          | YES        |
| 16 | ZLR-16     | HPV58:6714_HPV58:3820         | TGTAAACTGGCAGACGGAGG     | GTACACAGGGGACAAAGCGA     | 574bp                          | YES        |
| 17 | ZLR-16     | HPV58:6407_Chr17:57879164     | CACGCTGTAGCCAATAAGGC     | AAACCAATGCAATGTTACCGAAGA | 937bp                          | YES        |

Note: Only the breakpoints involved in the clonal integration event with less than three supporting chimeric reads were confirmed by PCR and Sanger sequencing.

**Table S5.** Quality metrics of RNA sequencing libraries.

| <b>Samples</b> | <b>Reads</b> | <b>Mean Quality Score</b> | <b>% of <math>\geq 30</math> Bases</b> | <b>Mapping rate (%)</b> |
|----------------|--------------|---------------------------|----------------------------------------|-------------------------|
| ZLR-01         | 60,569,930   | 35.2                      | 88.8                                   | 87.3                    |
| ZLR-02         | 63,322,460   | 35.3                      | 89.3                                   | 90.2                    |
| ZLR-03         | 67,710,800   | 35.3                      | 89.5                                   | 90.1                    |
| ZLR-04         | 81,848,382   | 36.0                      | 92.1                                   | 92.9                    |
| ZLR-05         | 58,941,818   | 37.5                      | 95.9                                   | 92.9                    |
| ZLR-06         | 167,903,836  | 36.5                      | 92.4                                   | 88.8                    |
| ZLR-07         | 132,446,838  | 36.9                      | 93.6                                   | 90.4                    |
| ZLR-08         | 120,230,506  | 36.6                      | 92.8                                   | 89.5                    |
| ZLR-09         | 101,007,676  | 37.0                      | 93.2                                   | 91.2                    |
| ZLR-10         | 95,936,494   | 37.7                      | 95.0                                   | 92.9                    |
| ZLR-11         | 95,951,638   | 36.6                      | 92.8                                   | 89.5                    |
| ZLR-12         | 137,763,726  | 37.5                      | 95.2                                   | 91.6                    |
| ZLR-13         | 42,200,030   | 37.4                      | 94.9                                   | 92.3                    |
| ZLR-14         | 135,594,710  | 39.7                      | 98.6                                   | 94.6                    |
| ZLR-15         | 110,793,764  | 37.2                      | 93.7                                   | 91.4                    |
| ZLR-16         | 119,187,674  | 39.0                      | 97.7                                   | 73.0                    |

**Table S6.** Statistical test and its associated significance of comparison between intSample and intRegion for each feature.

| SV type | Feature                                 | Statistical test type   | FDR of comparison between intSample and intRegion |
|---------|-----------------------------------------|-------------------------|---------------------------------------------------|
| DEL     | SV length                               | Wilcoxon test           | 0.3877                                            |
| DUP     | SV length                               | Wilcoxon test           | 0.0101                                            |
| INS     | SV length                               | Wilcoxon test           | 0.8425                                            |
| INV     | SV length                               | Wilcoxon test           | 0.4735                                            |
| INVDUP  | SV length                               | Wilcoxon test           | 0.1081                                            |
| BND     | Normalized distance to integration site | Kolmogorov–Smirnov test | 0.9071                                            |
| DEL     | Normalized distance to integration site | Kolmogorov–Smirnov test | 0.4069                                            |
| DUP     | Normalized distance to integration site | Kolmogorov–Smirnov test | 1.54E-06                                          |
| INS     | Normalized distance to integration site | Kolmogorov–Smirnov test | 1                                                 |
| INV     | Normalized distance to integration site | Kolmogorov–Smirnov test | 0.3159                                            |
| INVDUP  | Normalized distance to integration site | Kolmogorov–Smirnov test | 0.0034                                            |
| BND     | Replication timing                      | Kolmogorov–Smirnov test | 0.3253                                            |
| DEL     | Replication timing                      | Kolmogorov–Smirnov test | 0.0107                                            |
| DUP     | Replication timing                      | Kolmogorov–Smirnov test | 0.0001                                            |
| INS     | Replication timing                      | Kolmogorov–Smirnov test | 0.2380                                            |
| INV     | Replication timing                      | Kolmogorov–Smirnov test | 0.4465                                            |
| INVDUP  | Replication timing                      | Kolmogorov–Smirnov test | 0.0025                                            |
| BND     | Normalized distance to TAD              | Kolmogorov–Smirnov test | 0.2380                                            |
| DEL     | Normalized distance to TAD              | Kolmogorov–Smirnov test | 0.7724                                            |
| DUP     | Normalized distance to TAD              | Kolmogorov–Smirnov test | 0.0025                                            |
| INS     | Normalized distance to TAD              | Kolmogorov–Smirnov test | 0.8425                                            |
| INV     | Normalized distance to TAD              | Kolmogorov–Smirnov test | 0.4418                                            |
| INVDUP  | Normalized distance to TAD              | Kolmogorov–Smirnov test | 1.02E-05                                          |
| DUP     | pLI score                               | Wilcoxon test           | 0.1306                                            |
| INS     | pLI score                               | Wilcoxon test           | 0.8425                                            |
| INV     | pLI score                               | Wilcoxon test           | 0.9071                                            |
| INVDUP  | pLI score                               | Wilcoxon test           | 0.5871                                            |
| BND     | z-score                                 | Chi-squared test        | 0.4835                                            |
| DEL     | z-score                                 | Chi-squared test        | 0.5871                                            |
| DUP     | z-score                                 | Chi-squared test        | 0.3356                                            |
| INV     | z-score                                 | Chi-squared test        | 0.9071                                            |
| INVDUP  | z-score                                 | Chi-squared test        | 1                                                 |



**Table S7.** List of PCR primers and siRNAs used in this study

| <b>Ptimers</b> | <b>Sequences</b>       | <b>Size</b> | <b>Comments</b>             |
|----------------|------------------------|-------------|-----------------------------|
| E2-F           | TGGAAACACATGCGCCTAGA   | 612bp       |                             |
| E2-R           | CGTCTGTGTTTCTTCGGTGC   |             |                             |
| L2-F           | ACTTGCTCCTGTAAGACCCC   | 640bp       |                             |
| L2-R           | ACGCCTAGAGGTTAATGCTGG  |             |                             |
| H1-F           | GTGAGGAGAGGACAGCATAACC | 214bp       |                             |
| H1-R           | AGGTGGGACTAGGGCATCTT   |             |                             |
| H2-F           | GCTGTATTTGTTCCCTCCCAGC | 566bp       |                             |
| H2-R           | GACCAGTTTGTGTCTTGCGA   |             |                             |
| J1-F           | GACCCCTGGTATGGGTGTGC   | 607bp       | Junction 1                  |
| J1-R           | AGGGGATAAACGGATCACTGC  |             |                             |
| J2-F           | GGGTCTGTGCCATGAATGC    | 544bp       | Junction 2                  |
| J2-R           | TGTACGTTTCTGCTTGCCA    |             |                             |
| H3-F           | GTTGTACCAAAAGCTGCGCC   | 376bp       |                             |
| H3-R           | ATTTCCCCCAAGGCAAGCTA   |             |                             |
| H4-F           | TTTTCTGCCCTCTGCTCCAC   | 375bp       |                             |
| H4-R           | TGGCTCTGCGAAGAATTCCA   |             |                             |
| COX5B-F        | GGGCACCATTTTCCTTGATCAT | 119bp       |                             |
| COX5B-R        | AGTCGCCTGCTCTTCATCAG   |             |                             |
| pBR322-F       | GACTATCGTCGCCGCACTTA   | 179bp       |                             |
| pBR322-R       | GACCAGTGACGAAGGCTTGA   |             |                             |
| pUC19-F        | TGTAAAACGACGGCCAGTGA   | 137bp       |                             |
| pUC19-R        | TGTGTGGAATTGTGAGCGGA   |             |                             |
| pUG72-F        | CCCTTGGCGAAAAGTCCTCT   | 106bp       |                             |
| pUG72-R        | TAGACGACAAAGGCGATGCA   |             |                             |
| siRNA_1        | CTGCTGATTTGGGAACACT    | /           | siRNAs for LENG9 gene       |
| siRNA_2        | GGCTGAGCTTTAGAAAGCT    | /           |                             |
| siRNA_3        | GCTGAGTACACTACAGTCT    | /           |                             |
| qPCR_F         | GCCCCGCTTAGTGTTGCA     | /           | qPCR primers for LENG9 gene |
| qPCR_R         | GCCAGGGTCAGGTGTAGGTTTC | /           |                             |

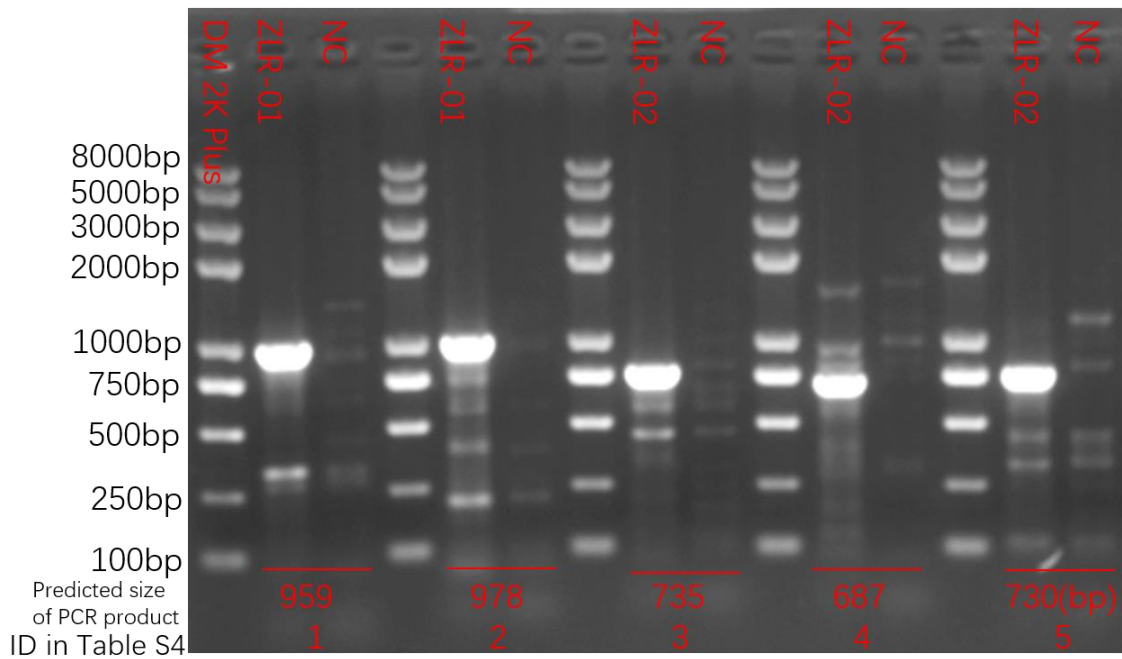

**Figure S1. PCR validation of breakpoints in clonal integration events.** Representative validation results of integration events are shown. Two independent experiments give the similar results. IDs of samples with detected integration events are indicated at the top. NC is a randomly selected sample without integration in the corresponding breakpoint. Two rows of numbers at the bottom are the predicted PCR product size and ID (the first column) in Table S4.

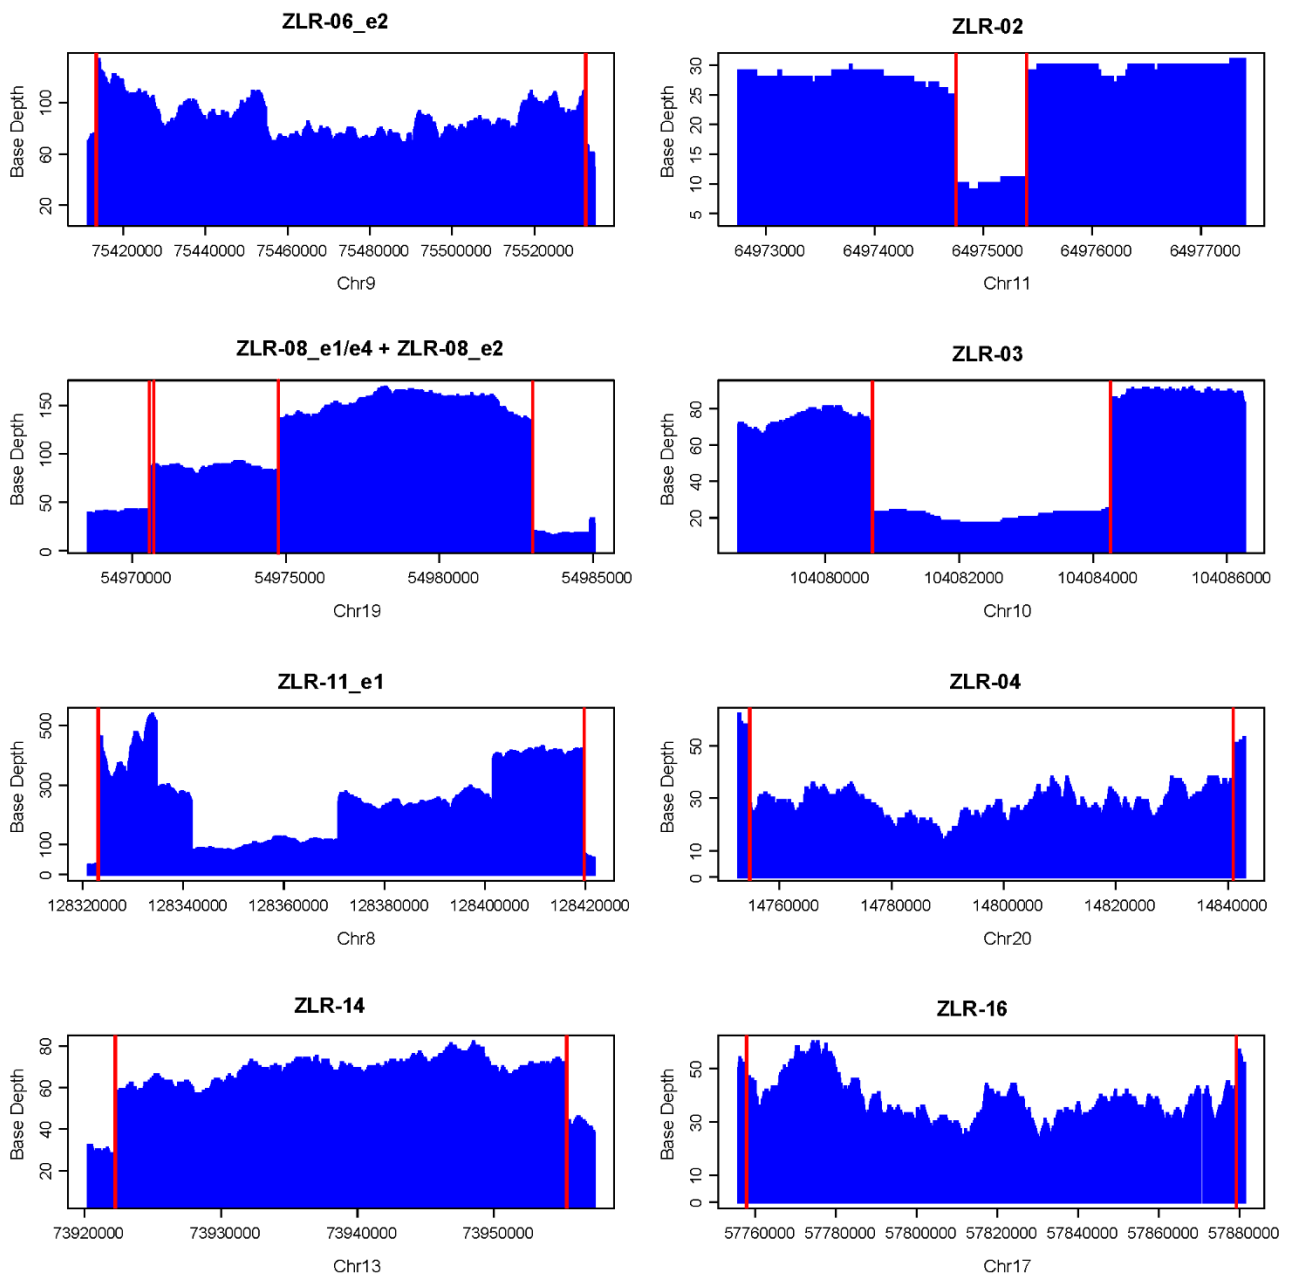

**Figure S2. The base coverage of regions around several integration events in the human genome.** Blue histograms show the depth of target regions (y-axis), with the indicated chromosomes and positions (x-axis). The red lines indicate the HPV integration breakpoint positions. For comparison, four types of ECC-related deletion in clonal integration events are shown in the left panel; four types of normal deletion in clonal integration events are shown in the right panel.

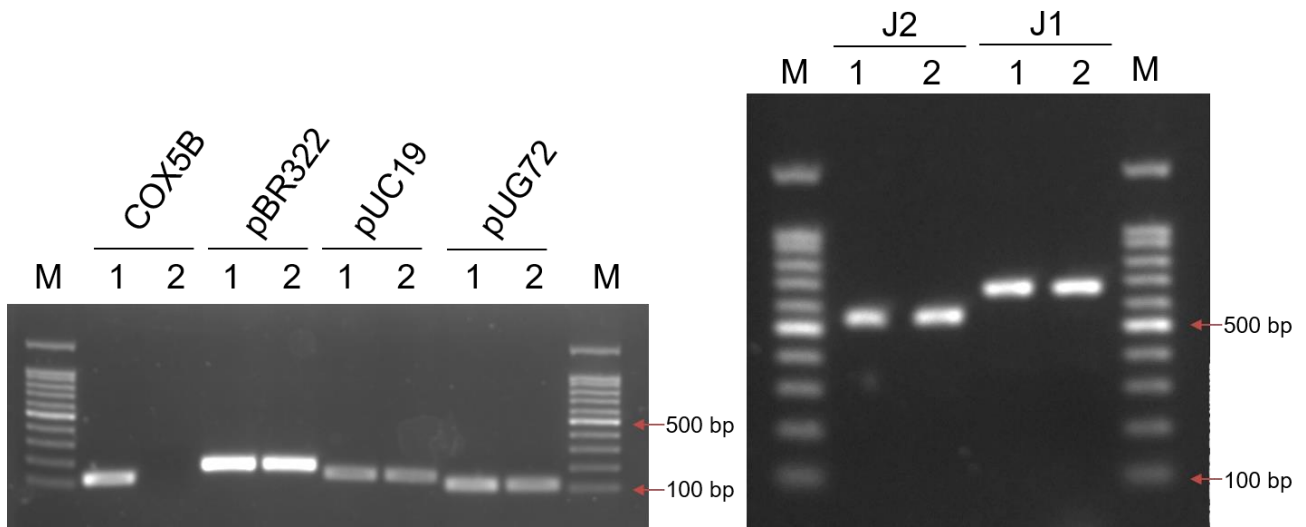

**Figure S3. PCR validation of the ECC DNA structure.** M: Marker; Lane 1: PCR with genomic DNA extracted from ZLR-11 as template; Lane 2: PCR with genomic DNA after the linear DNA removal as template; COX5B was a negative control for PCR reaction with linear DNA template; three internal plasmids, pBR322, pUC19 and pUG72, were positive controls for PCR reaction with circular DNA template. J2 and J1 were virus-human junction sites in ZLR-11\_e1. Two independent experiments give the similar results.

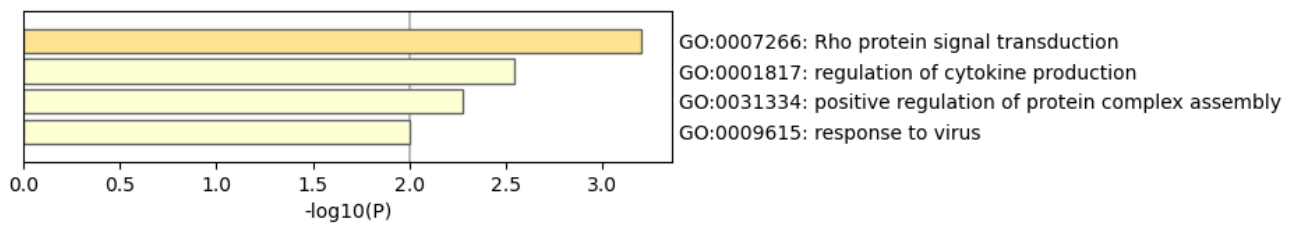

**Figure S4. GO and KEGG enrichment analysis of genes potentially disrupted by HPV integration.**

Combined list of genes nearby (about 500 kb) integration breakpoints and on the affected genomic regions by clonal integration events were submitted to Metascape, a web portal for GO and KEGG enrichment analysis (<https://metascape.org/gp/index.html>).

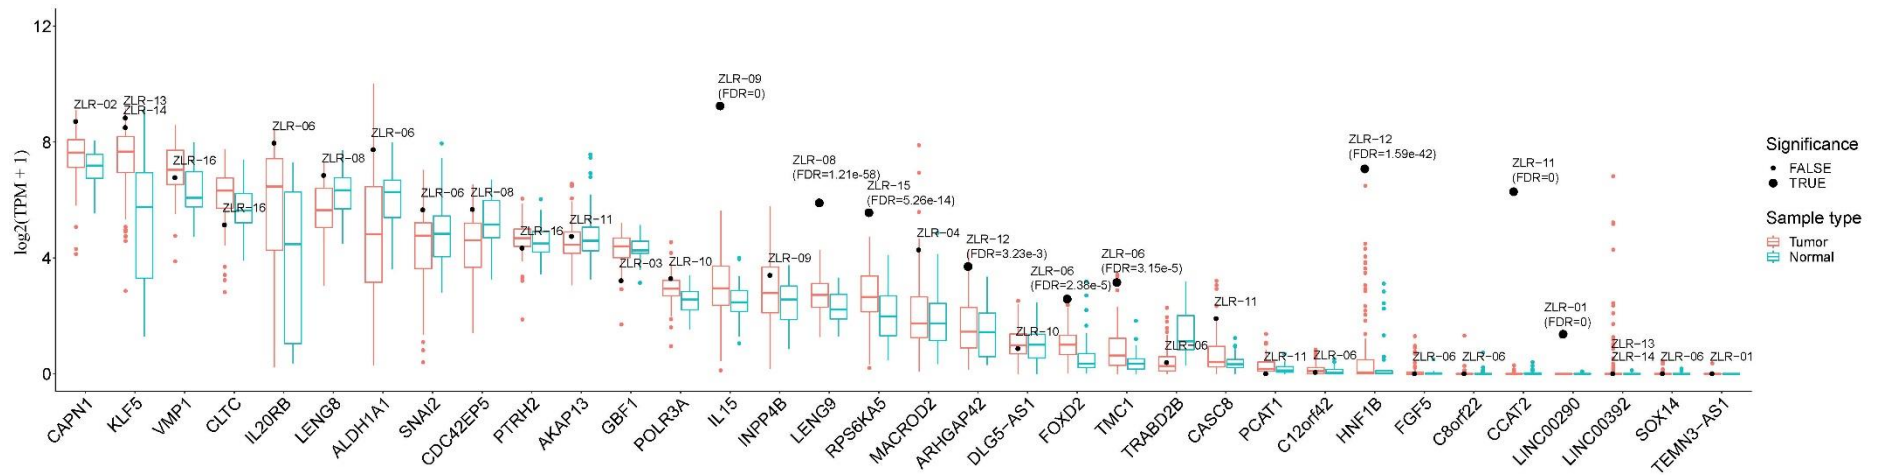

**Figure S5. Expression level of genes around integration breakpoints and on affected genomic regions resulting from clonal integration events.** The overall expression level in all tumors (n=103) and adjacent normal samples (n=39) is shown by boxplot. The expression level of a gene in an integrated sample is highlighted by black dots. Two-tailed p-values for changes in gene expression were generated by probability of the z-score occurring within a standard normal distribution and adjusted by the false discover rate (FDR). Significantly up-regulated genes with  $FDR < 0.05$  are highlighted by dots of larger size, and numbers in parentheses indicate actual p-values. Thirty-four of 38 genes have available expression data. Data are shown in boxplots. The thick line in the box is median, and the box spans from Q1 (25th percentile) to Q3 (75th percentile). The whiskers extend to the most extreme observation within 1.5 times the interquartile range ( $IQR=Q3-Q1$ ) from the nearest quartile. Outliers are represented by circles beyond the whiskers. Source data are provided as a Source Data file.

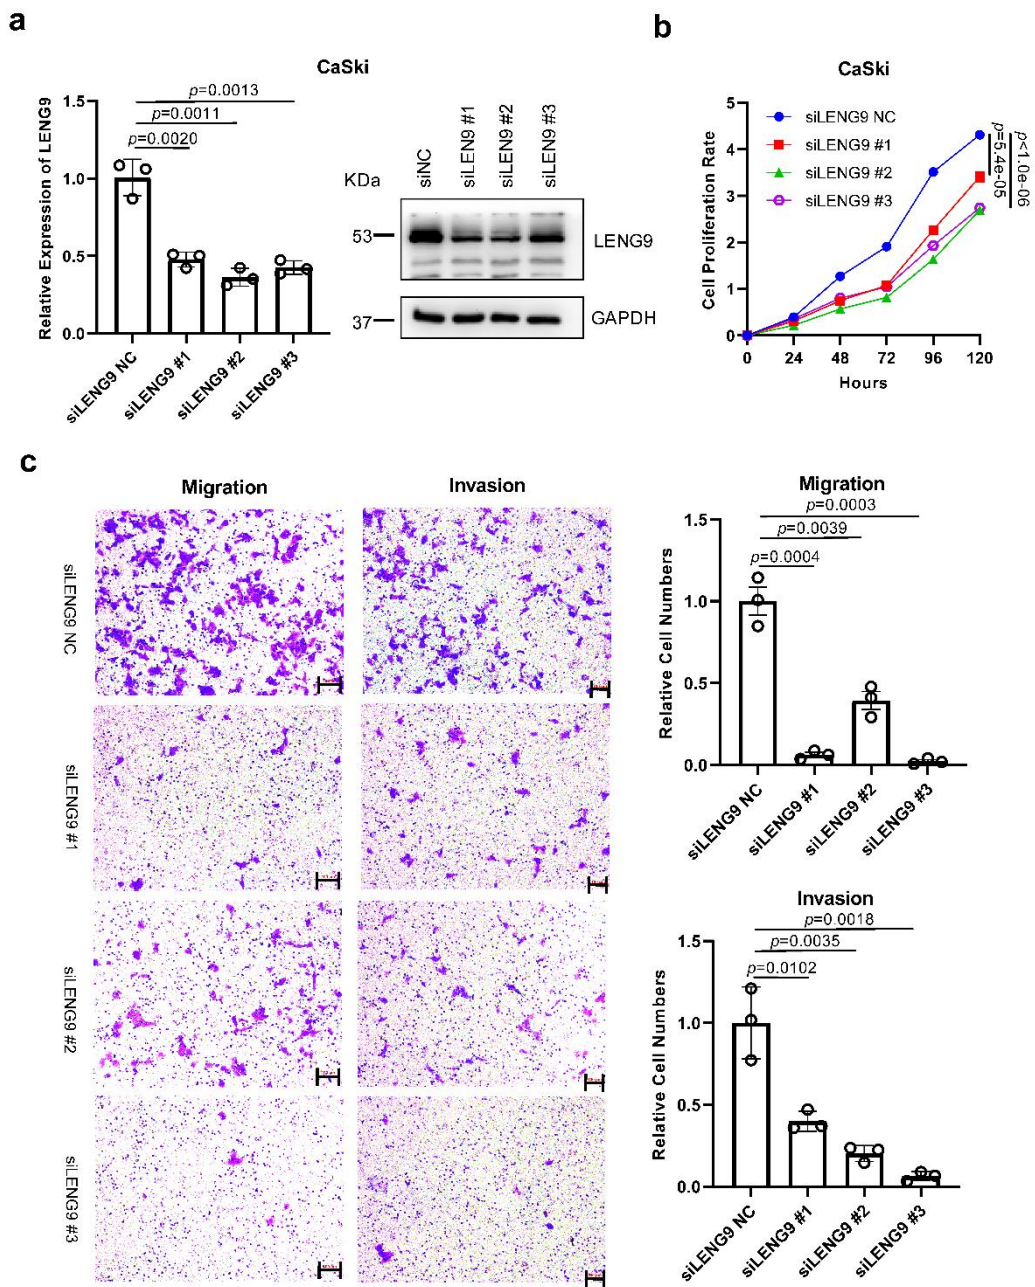

**Figure S6. Knockdown assays of LENG9 in cervical cancer cell line CaSki.** (a) The expression of LENG9 in CaSki cells transfected with three siRNAs targeting LENG9 and siRNA negative control. The expression levels of LENG9 were evaluated by both qRT-PCR and western blot. Data are presented as mean values  $\pm$  SEM (n=3) (b) Cell proliferation in CaSki cells transfected with three siRNAs targeting LENG9 and siRNA negative control, assessed by CCK8 (n=5). (c) Cell migration and invasion in CaSki cells transfected with three siRNAs targeting LENG9 and siRNA negative control, assessed by transwell assays. Scale bar, 100 $\mu$ m. Quantification of migration and invasion cells was summarized as histograms. Data are presented as mean values  $\pm$  SEM (n=3). Two sample t test was used for comparing the difference between siRNA and NC groups. Source data are provided as a Source Data file.

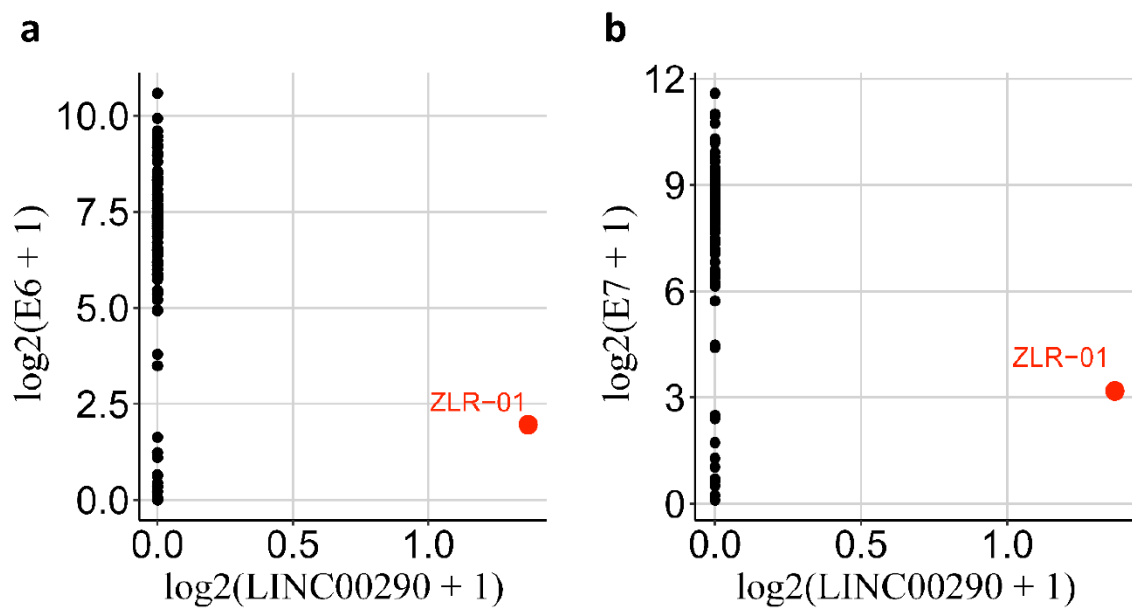

**Figure S7. Comparative expression level of LINC00290 and HPV E6/E7 genes in 103 cervical tumors. (a) E6. (b) E7. Source data are provided as a Source Data file.**



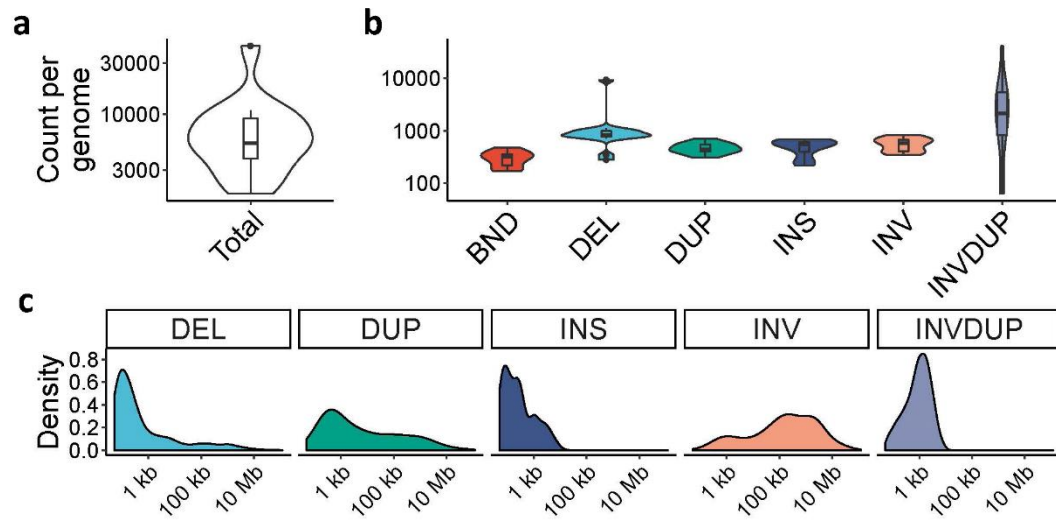

**Figure S8. Structural variation landscape in cervical cancer. (a-b)** SV count per genome (n=15). **(c)** Size distribution of five SV types. In panels a and b, the data are shown in violin plot with the addition of kernel density plot including a boxplot. For boxplot, the thick line in the box is median and the box spans from Q1 (25th percentile) to Q3 (75th percentile); the whiskers extend to the most extreme observation within 1.5 times the interquartile range (IQR=Q3–Q1) from the nearest quartile; outliers are represented by circles beyond the whiskers. Source data are provided as a Source Data file.

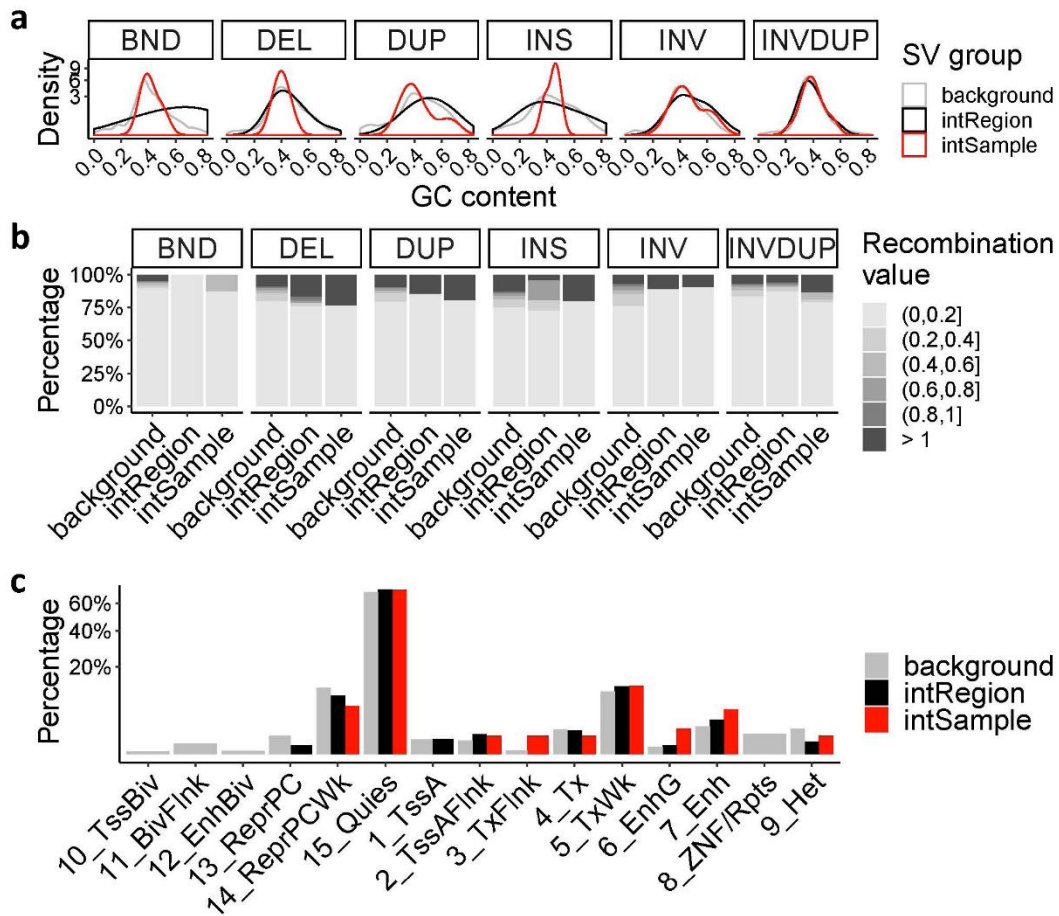

**Figure S9. Genomic properties of structural variations in different regions.** (a) Distribution of GC content of SVs in different regions per SV type. (b) Recombination value composition of SVs in different regions per SV type. (c) Chromatin state of SVs in different regions. Source data are provided as a Source Data file.

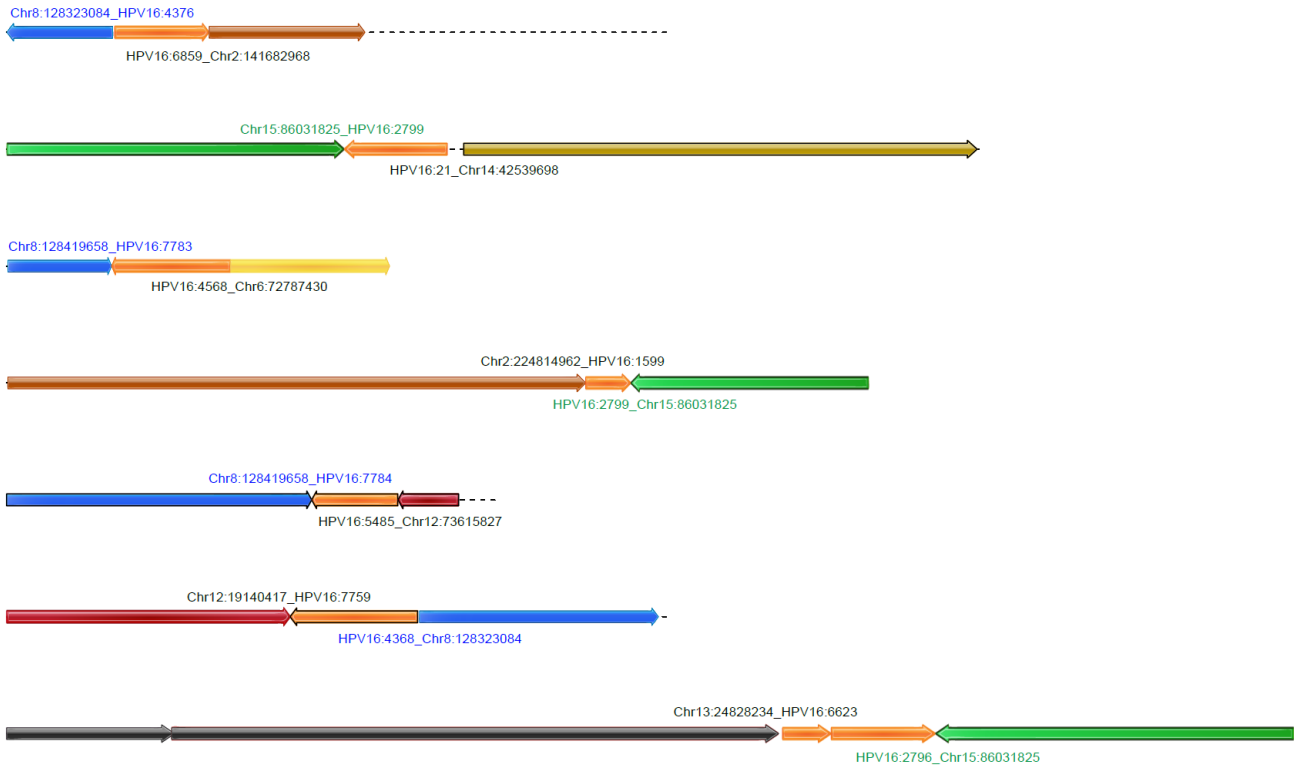

**Figure S10. Seven additional clonal integration events with one supporting chimeric read in ZLR-11.** Due to the inability to design PCR primers or the weak bands of PCR products, one of the breakpoints in these rare events has yet to be verified.

Uncropped scans of gels for Supplementary figure 1 and Supplementary figure 3:

Supplementary figure 1:

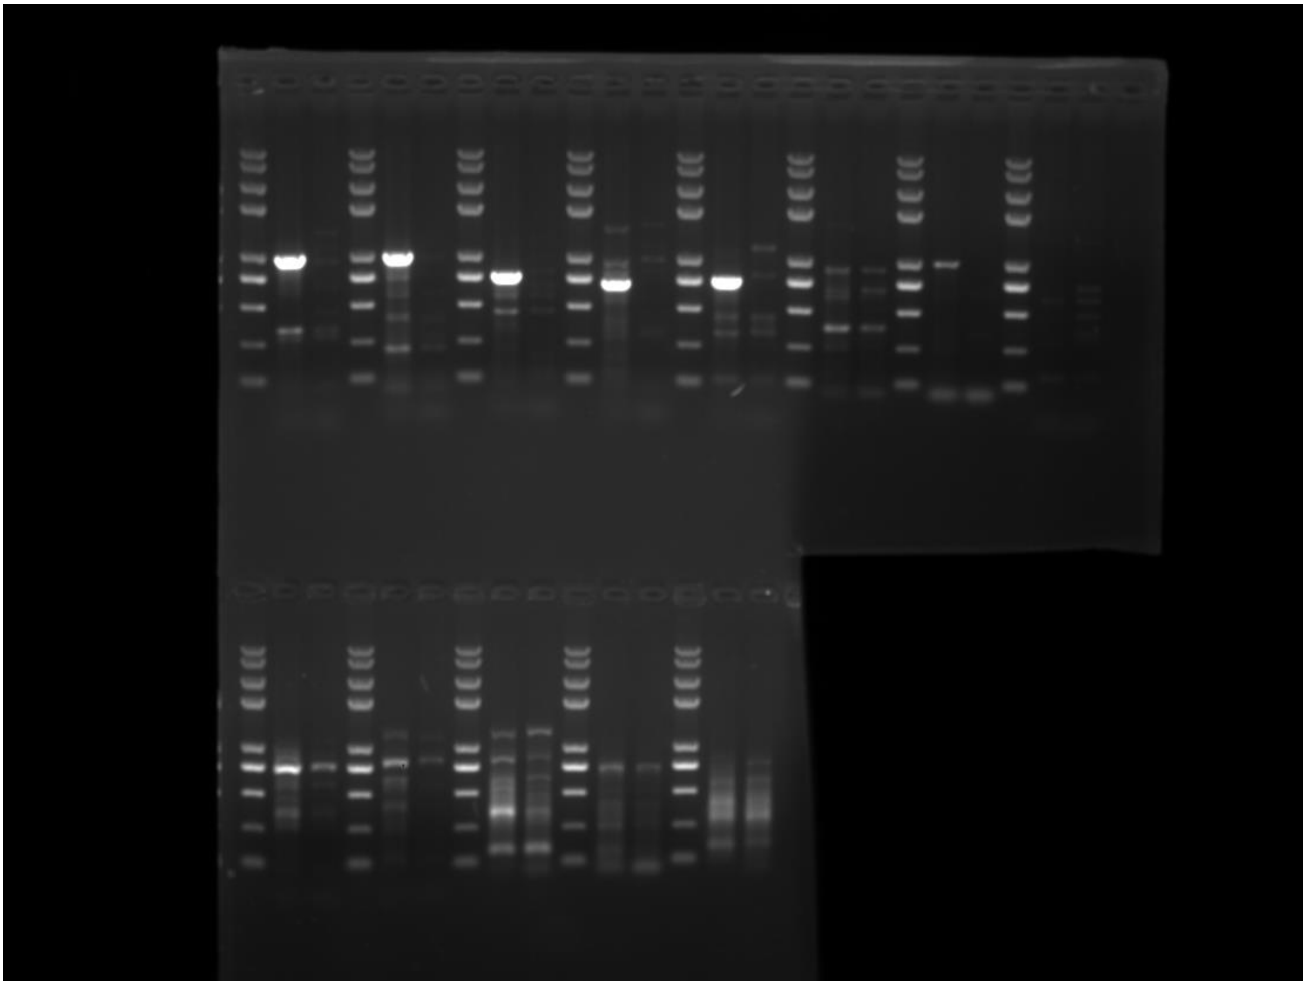

Supplementary figure 3:

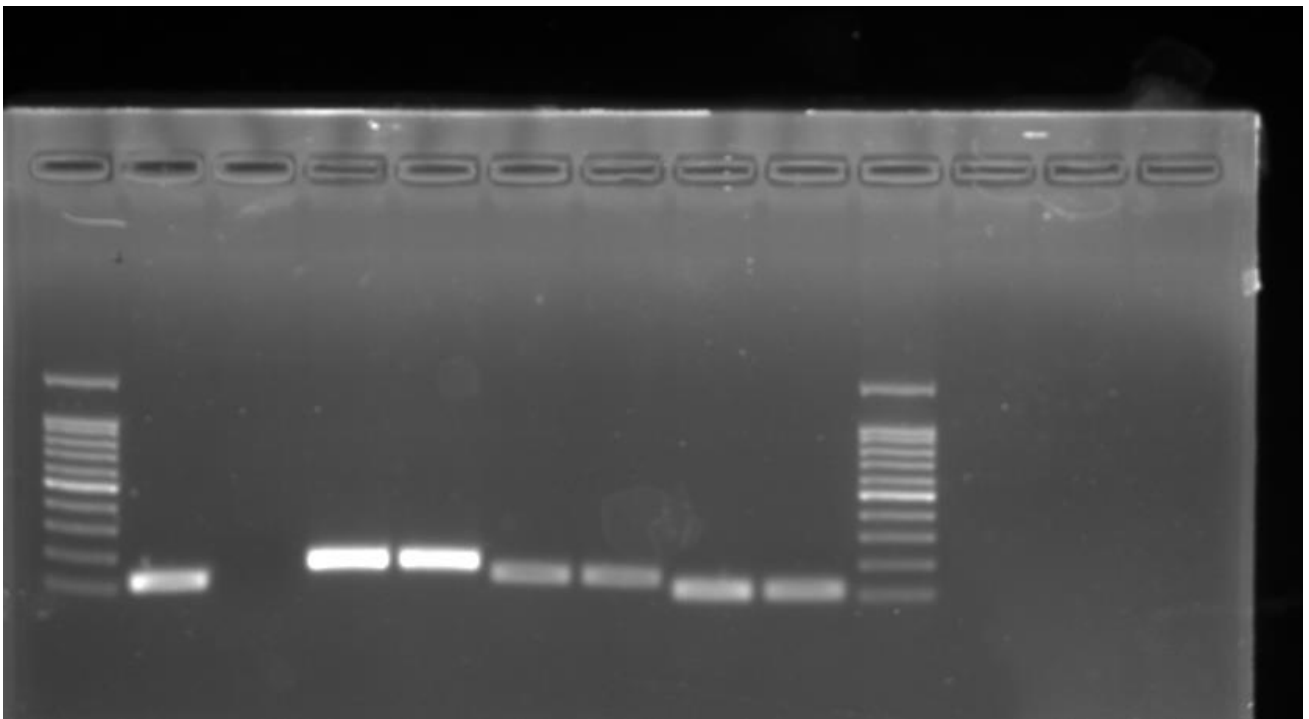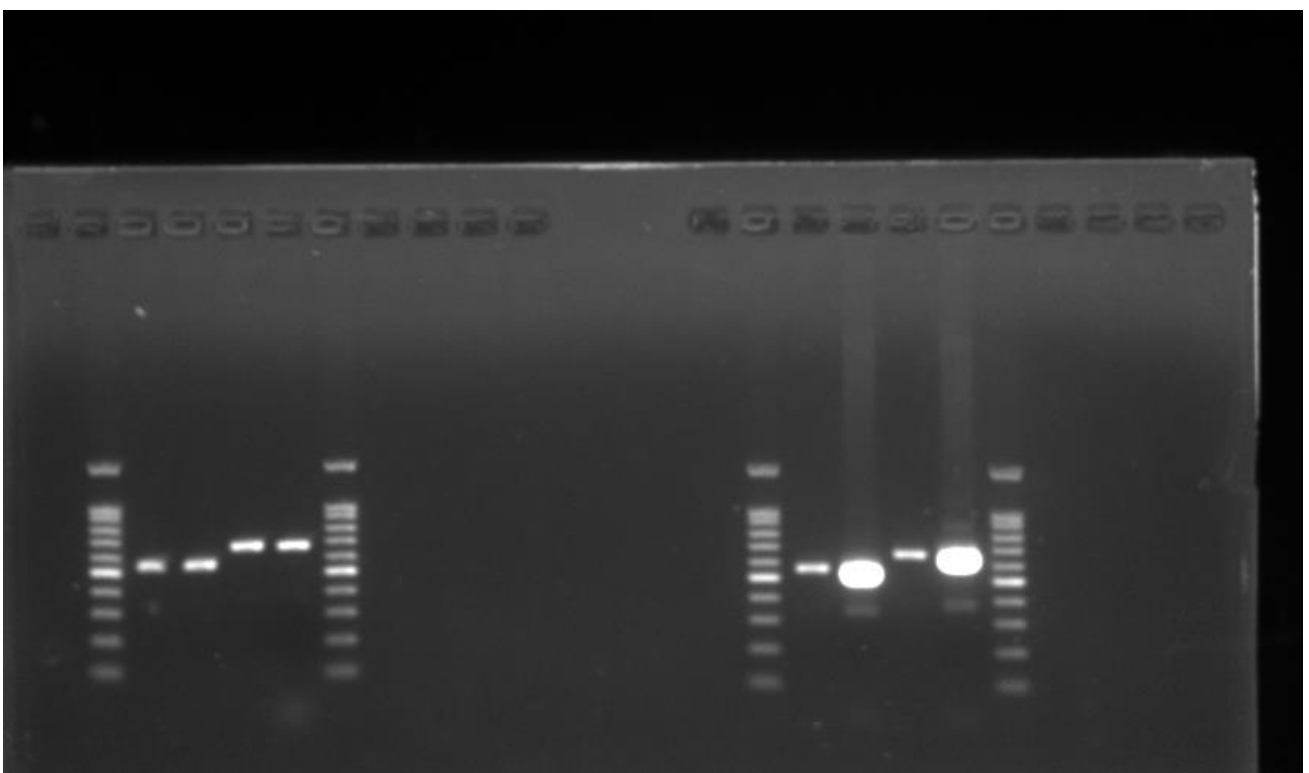

Supplement: 41467_2022_30190_MOESM1_ESM.pdf [file 41467_2022_30190_MOESM1_ESM.pdf]
